# Supplementary material for: Development of a Novel Intra-Operative Evaluation Method for the Directions and Degrees of Malrotation in Supracondylar Humerus Fractures
Source: Research Square preprint supplement (doi:10.21203/rs.3.rs-1526804/v2), 2022-05-02
Supplement: Supplementary file 1 [file 2a19c7f64e05e1bd79472512.xlsx]

## Sheet: Sheet-1
The width at the same level with fracture in an intact elbow of SCHF child
Rotation Degrees (°)	Width (mm)
0	36.73
5	35.68
10	35.47
15	35.5
20	34.39
25	33.56
30	32.28
35	31.34
40	30.19
45	28.91
50	26.57
55	25.16
60	23.93
65	22.37
70	21.18
75	20.18
80	18.85
85	17.74
90	15.98

## Sheet: Sheet-2
Establishment of a mathematical model by scanning the 3D printed model through C-arm
Rotation Degrees (°)	Width （mm）
	1st time	2nd time	3rd time
0	58.86	59.83	60.84
5	56.7	57.1	56.51
10	53.5	53.9	53.32
15	51	51.35	51.82
20	49.13	47.36	47.82
25	46.8	46.61	47.02
30	44.67	44.35	44.5
35	42.51	42.39	42.81
40	40.3	40.19	40.85
45	37.61	38.17	38.63
50	35.73	35.44	36.1
55	33.8	33.62	34.06
60	31.5	31.84	32.1
65	29.96	29.94	30.22
70	28.44	28.62	28.11
75	27.01	26.65	26.72
80	25.68	25.83	25.48
85	24.31	24.16	24.42
90	22.5	22.61	22.81

## Sheet: Sheet-3
Scanning the 3D printed model through C-arm in 45° oblique position
Rotation Degrees (°)	Width （mm）
	1st time	2nd time	3rd time
-90	39.51	40.17	40.93
-85	41.3	40.09	42.65
-80	42.11	42.09	43.61
-75	44.97	44.15	44.5
-70	46.8	46.01	47.82
-65	49.13	47.06	47.82
-60	50.1	51.35	52.82
-55	54.5	53.9	55.32
-50	58.7	57.1	55.51
-45	57.86	59.83	61.54
-40	59.2	57.6	58.51
-35	55.2	57.2	54.32
-30	52.7	53.35	54.42
-25	49.53	50.36	47.42
-20	46.8	45.61	48.02
-15	44.67	44.35	44.5
-10	42.51	41.39	43.81
-5	41.3	40.69	42.45
0	40.61	39.57	41.23
5	36.73	35.44	38.1
10	33.8	32.62	35.06
15	31.5	32.84	31.1
20	29.96	28.94	31.12
25	28.44	29.22	27.41
30	28.01	26.05	26.72
35	25.18	24.83	23.58
40	23.25	22.16	22.12
45	22	22.61	22.01
50	22.11	23.16	22.62
55	24.18	22.73	24.48
60	24.81	24.15	24.72
65	27.44	28.62	26.11
70	29.06	29.94	31.22
75	31.22	31.84	32.57
80	33.8	33.42	34.26
85	35.73	35.14	36.4
90	37.01	38.17	39.23

## Sheet: Sheet-4
Evaluation of rotation direction and degrees of SCHF in models（Researcher 1）
Rotation degrees < 45°
	Distal fracture line width (mm)	Rotation direction	Calculated value, X* (°)		Corrected degrees (°)		Real location
							Direction	Degrees(°)
1	32.79	Internal	15		15		Internal	15
2	23.01	Internal	38.9		40**		Internal	45
4	28.57	Internal	25.3		25**		Internal	30
3	53.51	External	35.5		35**		External	30
5	46.02	External	17.3		15		External	15
6	58.15	External	46.9		45		External	45
Rotation degrees > 45°
	Distal fracture line width (mm)	Rotation direction	X* (°)	90-X(°)	Corrected degrees (°)
7	23.91	Internal	36.7	53.3	35*		Internal	60
8	30.25	Internal	21.2	68.8	70**		Internal	75
9	38.69	External	0.6	89.4	90		External	90
10	52.56	External	33.2	56.8	55**		External	60
	* Rotation degrees: X=|(57.39-Y)/0.41-45| , Y represented the width of distal fracture line.
Evaluation of rotation direction and degrees of SCHF in models（Researcher 2）
Rotation degrees < 45°
	Distal fracture line width (mm)	Rotation direction	Calculated value, X1(°)		Corrected degrees (°)		Real location
							Direction	Degrees(°)
1	32.19	Internal	16.5		15		Internal	15
2	22.62	Internal	39.8		40**		Internal	45
4	28.07	Internal	26.5		25**		Internal	30
3	53.17	External	34.7		35**		External	30
5	45.22	External	15.3		15		External	15
6	56.89	External	43.8		45		External	45
Rotation degrees > 45°
	Distal fracture line width (mm)	Rotation direction	X1(°)	90-X1(°)	Corrected degrees (°)
7	24.18	Internal	36	54	55**		Internal	60
8	30.28	Internal	21.1	68.9	70**		Internal	75
9	38.14	External	1.9	88.1	90		External	90
10	52.02	External	31.9	58.1	30*		External	60
Evaluation of rotation direction and degrees of SCHF in models（Researcher 3）
Rotation degrees < 45°
	Distal fracture line width (mm)	Rotation direction	Calculated value, X1(°)		Corrected degrees (°)		Real location
							Direction	Degrees(°)
1	33.31	Internal	13.7		15		Internal	15
2	23.55	Internal	37.5		35*		Internal	45
4	28.01	Internal	26.7		25**		Internal	30
3	53.96	External	42.4		40*		External	30
5	46.54	External	18.5		20**		External	15
6	57.85	External	46.1		45		External	45
Rotation degrees > 45°
	Distal fracture line width (mm)	Rotation direction	X1(°)	90-X1(°)	Corrected degrees (°)
7	24.21	Internal	35.9	54.1	55**		Internal	60
8	31.05	Internal	19.2	70.8	20*		Internal	75
9	39.54	Internal*	1.5	88.5	90		External	90
10	53.04	External	34.4	55.6	55**		External	60
Evaluation of rotation direction and degrees of SCHF in models（Researcher 4）
Rotation degrees < 45°
	Distal fracture line width (mm)	Rotation direction	Calculated value, X1(°)		Corrected degrees (°)		Real location
							Direction	Degrees(°)
1	32.89	Internal	14.8		15		Internal	15
2	23.51	Internal	37.6		40**		Internal	45
4	28.37	Internal	25.8		25**		Internal	30
3	53.22	External	34.8		35**		External	30
5	46.63	External	18.8		20**		External	15
6	58.87	External	48.6		50**		External	45
Rotation degrees > 45°
	Distal fracture line width (mm)	Rotation direction	X1(°)	90-X1(°)	Corrected degrees (°)
7	23.15	Internal	38.5	51.5	50*		Internal	60
8	30.56	Internal	20.4	69.6	70**		Internal	75
9	38.74	External	0.5	89.5	90		External	90
10	52.14	External	32.2	57.8	60		External	60
Evaluation of rotation direction and degrees of SCHF in models（Researcher 5）
Rotation degrees < 45°
	Distal fracture line width (mm)	Rotation direction	Calculated value, X1(°)		Corrected degrees (°)		Real location
							Direction	Degrees(°)
1	32.06	Internal	16.8		15		Internal	15
2	22.66	Internal	39.7		40**		Internal	45
4	27.04	Internal	29		30		Internal	30
3	52.08	External	32		30		External	30
5	47.66	External	21.3		20**		External	15
6	59.55	External	50.2		45		External	45
Rotation degrees > 45°
	Distal fracture line width (mm)	Rotation direction	X1(°)	90-X1(°)	Corrected degrees (°)
7	23.88	Internal	36.7	53.3	35*		Internal	60
8	30.36	Internal	20.9	69.1	70**		Internal	75
9	38.89	Internal*	0.1	89.9	90		External	90
10	52.09	External	32.1	57.9	60		External	60
	* The red font is considered to be vastly different, which is more than 5° or with a wrong direction
	** The yellow grid is considered to be within acceptable range of difference, which is equal or less than 5°

## Sheet: Sheet5
	Accuracy after Application of this Novel Method in Clinical Patients
	Internal ratotion: +			External ratotion: -
		1	2	3	4	5	6	ICC	95%CI
	Min-Max width(mm)	10-28	15-38	13-40	14-45	15-44	13-47
	Y(width)	Y=28-0.2X	Y=38-0.28X	Y=40-0.3X	Y=45-0.35X	Y=44-0.36X	Y=47-0.36X
	Rotate degree by CT	(28-Y)/0.2-45	(38-Y)/0.28-45	(40-Y)/0.3-45	(45-Y)/0.35-45	(44-Y)/0.36-45	(47-Y)/0.36-45
	Rotate degree	15	33	52	-28	10	-44	0.979	0.933-0.997
	Relative width	16	16.16	15.1	39.05	24.2	46.64
Calculated width(mm)	Researcher 1	17.8	16.1	14.2	35.2	22.8	48.6
	Researche 2	15.2	13.8	13.5	33.2	23.2	44.2
	Researche 3	13.5	15.5	16.3	38.7	26.5	45.6
	Researche 4	16.7	18.6	16.8	41.2	25.6	47.5
	Researche 5	16.4	17.4	15.3	42.8	22.9	46.6
	Calculated degree
Rotated degree	Researcher 1	6	33	41	-17	13.9	-49.4
	Researche 2	19	41.4	45.3	-11.3	12.8	-37.2
	Researche 3	27.5	35.4	56	-27	3.6	-41.1
	Researche 4	11.5	24.3	32.3	-34.1	6.1	-46.4
	Researche 5	13	28.6	53	-38.7	13.6	-43.9
Accuracy	Error in 5			Error in 10
	15/30			24/30
	Marked in red			Marked in yellow
